# Supplementary material
Source: Springer Nature journal article supplement (https://www.springermedizin.de/resource/supplementary/13054_2004_2995_MOESM6_ESM.pdf/9719466)

# Apoptosis

■ bodies  
□ cells

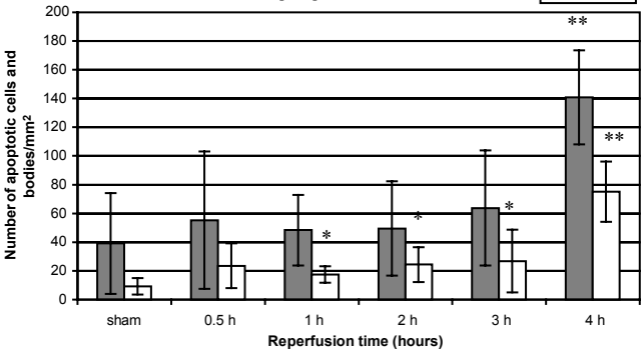

Supplement: MOESM6 [file 9719466]
